# Supplementary material
Source: publisher site journal article supplement (https://www.dovepress.com/article/396239)
Supplement: Supplementary file 1 [file get_supplementary_file.php]

**Table S1 Protein-protein interaction analysis of the differentially expressed proteins.**

| Protein | Degree |
| --- | --- |
| C9 | 7 |
| PON1 | 4 |
| HPX | 4 |
| CFHR1 | 2 |


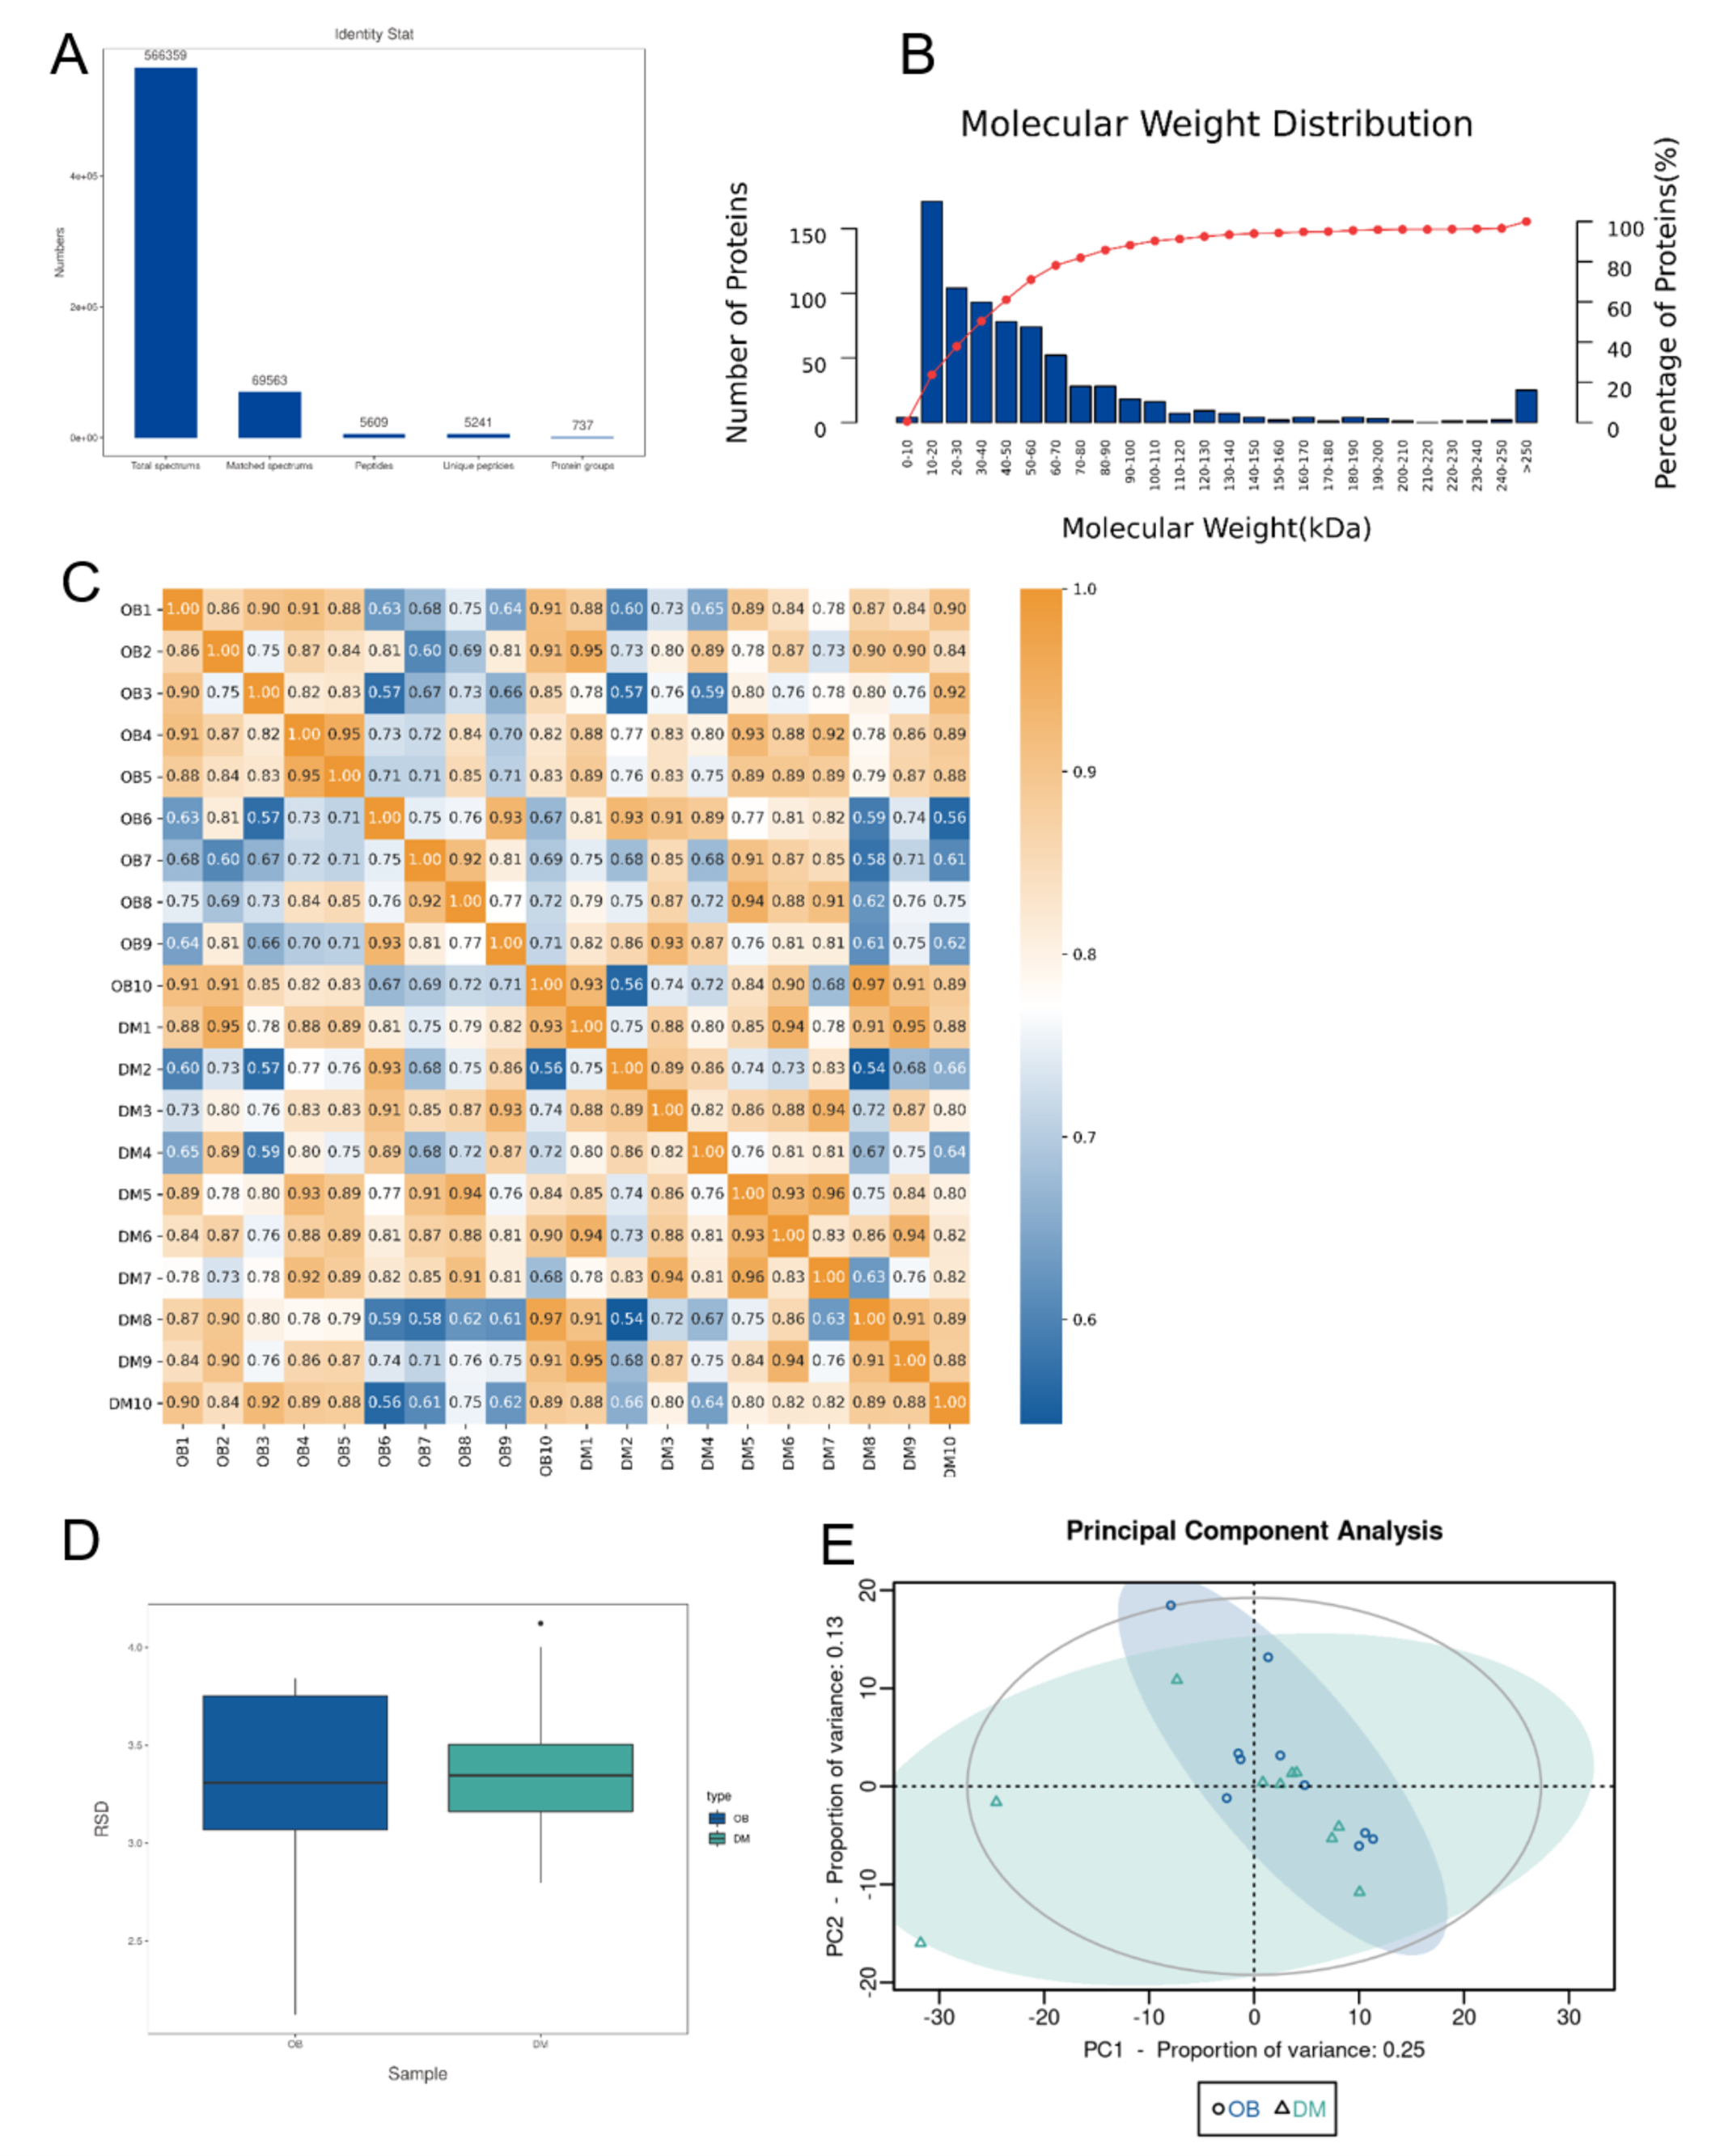


**Figure S1 Quality control of the mass spectrometry data.** A. The number of proteins/peptides identified by mass spectrometry. B. Molecular weight distribution. C. Heatmap of Pearson correlation coefficient. D. Relative standard deviation. E. Principal component analysis. OB, obese patients with type 2 diabetes; DM, non-obese patients with type 2 diabetes.
